# Supplementary material for: Gold nanoparticle–ultrananocrystalline diamond hybrid structured materials for high-performance optoelectronic device applications
Source: Royal Society of Chemistry journal article supplement (doi:10.1039/c4nr07030e), 2015-01-01
Supplement: c4nr07030e1.pdf [file c4nr07030e1.pdf]

### Supporting Information

#### Gold nanoparticles-ultrananocrystalline diamond hybrid structured materials for high-performance optoelectronic device applications

Kamatchi Jothiramalingam Sankaran,<sup>a</sup> Srinivasu Kunuku,<sup>b</sup> Balakrishnan Sundaravel,<sup>c</sup> Ping-Yen Hsieh,<sup>a</sup> Huang-Chin Chen,<sup>d</sup> Keh-Chyang Leou,<sup>b</sup> Nyan-Hwa Tai,<sup>\*a</sup> and I-Nan Lin<sup>\*d</sup>

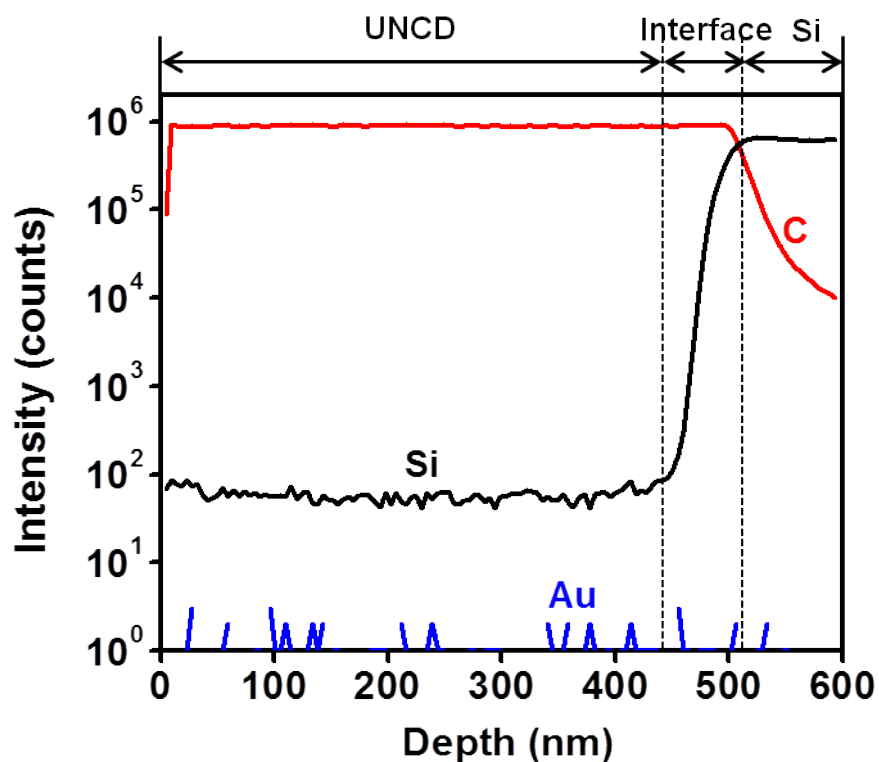

**Figure S1.** SIMS depth profiles of C, Au, and Si species in UNCD/Si materials.

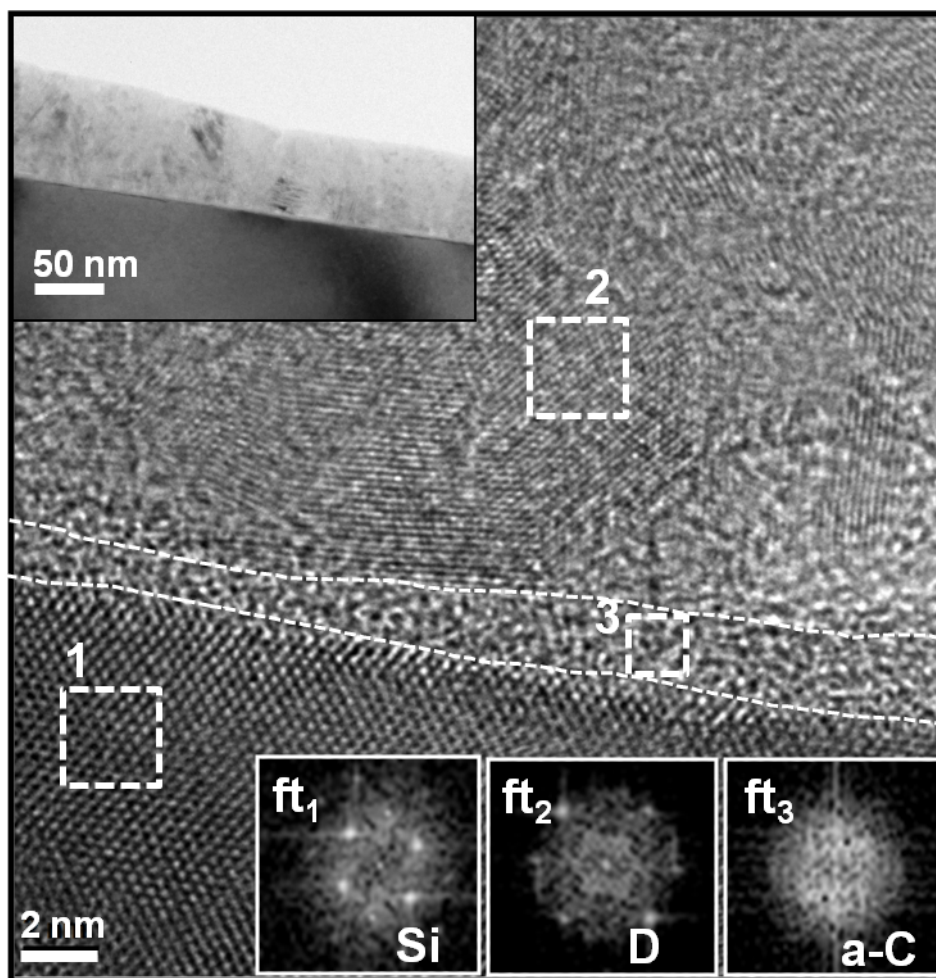

**Figure S2.** High magnification HRTEM image with upper-left inset shows the low magnification TEM image of UNCD/Si materials. FT patterns of the corresponding regions marked 1, 2, and 3 in the HRTEM image are shown in the insets ft<sub>1</sub>, ft<sub>2</sub>, and ft<sub>3</sub>, respectively.

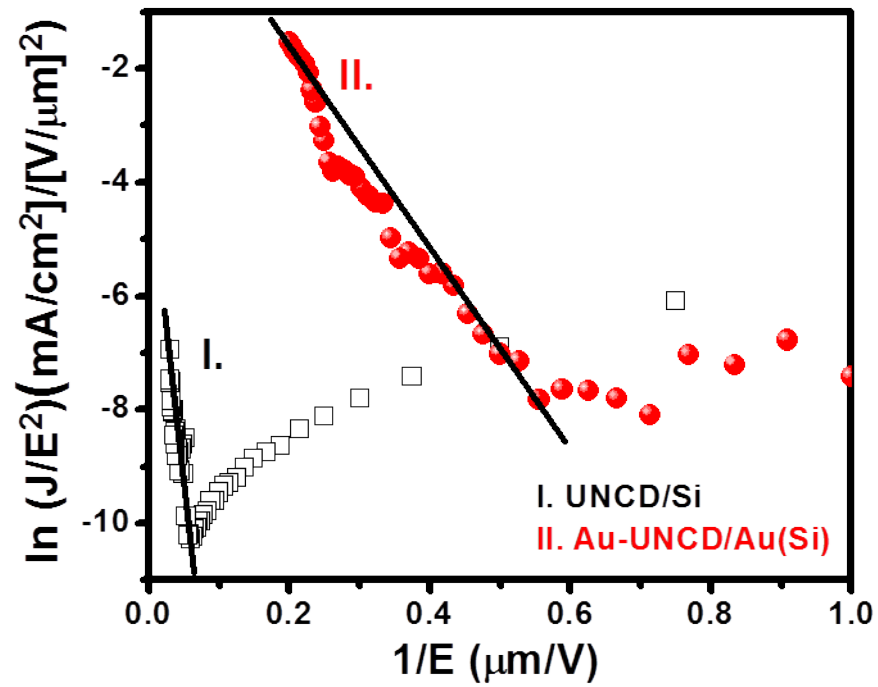

**Figure S3.** (a) The F-N plots of the corresponding  $J_e$ - $E$  characteristic curves, which were used for evaluating the effective work function of the emitting materials: I. UNCD/Si and II. Au-UNCD/Au(Si) hybrid materials.

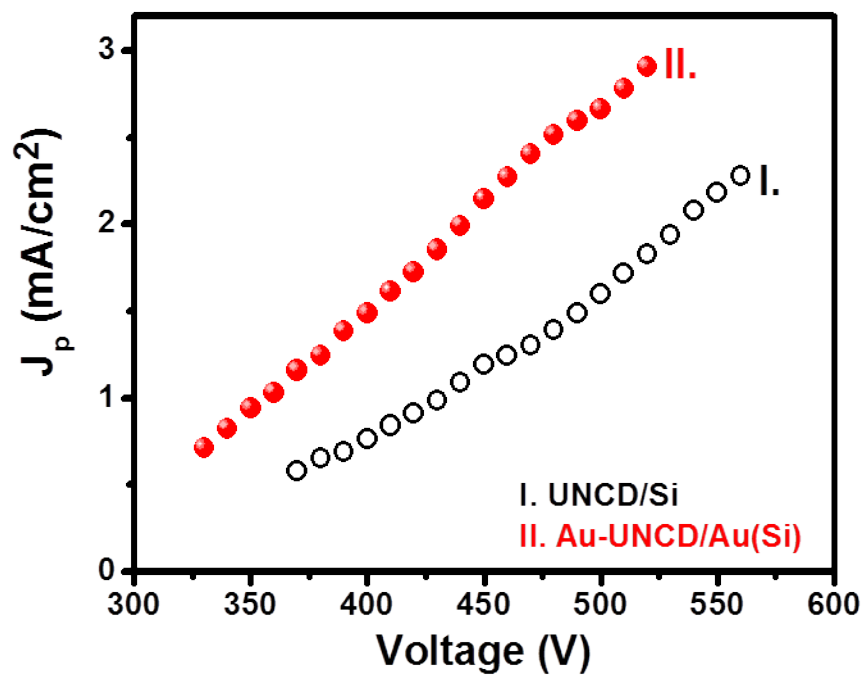

**Figure S4.** The plasma density against applied field curves, which were used for calculating the plasma density for the microplasma devices using for I. UNCD/Si and II. Au-UNCD/Au(Si) hybrid materials as cathode materials.

### Estimation of plasma density ( $n_p$ ) from plasma current density ( $J_p$ ):

We have estimated the plasma density ( $n_p$ ), which is also the electron density ( $n_e$ ), in the plasma, by using the Child's Law, shown in equation 2.<sup>1</sup>

$$n_e = \frac{J_c}{eu_B} \text{-----} (2)$$

Here  $n_e$  is the electron density,  $J_p$  is plasma current density at cathode,  $e$  is the electron charge and  $\mu_B$  is the Bohm velocity. Bohm velocity of Ar ion is strictly depends on the kinetic energy of the electron and the mass of ion, which has described as below equation 3.<sup>2</sup>

$$u_B = \sqrt{\frac{kT_e}{m_i}} \text{-----} (3)$$

Here  $k$  is the Boltzmann constant and  $T_e$  is electron temperature is 7841 K.<sup>3</sup> By substituting the Bohm velocity in the equation 1, we can attain the complete equation for estimation of electron density, shown below equation (4).

$$n_e = \frac{J_c \sqrt{m_i}}{e \sqrt{kT_e}} \text{-----} (4)$$

1 M. A. Lieberman and A. J. Lichtenberg, *Principles of Plasma Discharges and Materials Processing*, 2<sup>nd</sup> Ed; John Wiley & Sons:Hoboken, NJ, USA 2005.

2 B. Chapman, *Sputtering and Plasma Etching*, John Wiley & Sons, New York, USA 1980.

3 K. Srinivasu, K. J. Sankaran, K. C. Leou, N. H. Tai and I. N. Lin, *Plasma Sources Sci. Technol.* **2014** (Submitted).
